# Supplementary material
Source: PubMed Central journal article supplement (PMC4170050)
Supplement: NIHMS589975-supplement-01.pdf [file NIHMS589975-supplement-01.pdf]

## Supplemental Material

### Attrition Analysis

Compared to those with data at both time-points, participants who did not complete the follow-up were older ( $M=73.27$  [ $SD=11.46$ ] vs.  $66.49$  [ $SD=10.15$ ] years old;  $F(1,7620)=424.84$ ,  $p<.01$ ), less educated ( $M=11.88$  [ $SD=3.32$ ] vs.  $12.74$  [ $SD=3.02$ ] years of education;  $F(1,7620)=79.13$ ,  $p<.01$ ), and more likely to be male (17% of men vs 14% of women did not participate at follow-up;  $\chi^2[1, N=7622]=10.64$ ,  $p<.01$ ); there were no differences by ethnicity ( $\chi^2[2, N=7622]=1.46$ , *ns*). Of the eight types of perceived discrimination measured, there were attrition differences in two: A greater percentage of participants who reported that they experienced discrimination based on a physical disability did not have follow-up data (28%) than the percentage of participants who did not experience this type of discrimination (14%;  $\chi^2[1, N=7622]=69.89$ ,  $p<.05$ ), and a greater percentage of participants who did not report sex discrimination did not have follow-up data (16%) than participants who did report sex discrimination (11%;  $\chi^2[1, N=7622]=1.4.44$ ,  $p<.05$ ).

## Supplemental Table 1

*t*-value for Each Standardized Beta Coefficient Reported in Table 2

|                         | Self-rated Health (poor) |           |        | Disease Burden |           |        |
|-------------------------|--------------------------|-----------|--------|----------------|-----------|--------|
|                         | Baseline                 | Follow up | Change | Baseline       | Follow up | Change |
| Demographic covariates  |                          |           |        |                |           |        |
| Age                     | 8.73                     | 7.73      | 5.66   | 30.06          | 22.73     | 4.99   |
| Age squared             | 1.56                     | 2.39      | 1.52   | -8.49          | -7.86     | -4.61  |
| Sex                     | -1.18                    | -1.62     | -1.65  | 1.53           | -.55      | -3.92  |
| Ethnicity (Black)       | 8.74                     | 7.36      | 2.61   | 6.83           | 5.68      | .44    |
| Ethnicity (Other)       | .33                      | 2.22      | 1.69   | .18            | -.04      | .55    |
| Education               | -25.20                   | -19.25    | -4.78  | -9.09          | -9.43     | -3.07  |
| Discrimination based on |                          |           |        |                |           |        |
| Race                    | 2.05                     | 1.62      | -.02   | 1.62           | 2.06      | 1.59   |
| Ancestry                | 1.85                     | 2.40      | 1.66   | .20            | 1.41      | 2.48   |
| Sex                     | -2.73                    | -1.37     | -.09   | -.65           | -1.95     | -1.62  |
| Age                     | 4.34                     | 6.58      | 4.37   | 4.67           | 6.76      | 4.46   |
| Weight                  | 12.50                    | 11.65     | 5.82   | 12.28          | 12.33     | 4.97   |
| Physical disability     | 21.07                    | 15.61     | 4.99   | 13.55          | 12.98     | 3.88   |
| Appearance              | 4.56                     | 3.42      | 1.19   | 3.55           | 3.34      | 1.01   |
| Sexual orientation      | 1.21                     | 1.01      | .25    | .86            | -.07      | -2.35  |

*Note.* *t*-statistic for each standardized beta coefficient in Table 3. For self-rated health,  $n=7,614$  at baseline ( $df=7606$ ) and  $n=6,445$  ( $df=6437$ ) at follow-up. For disease burden,  $n=7,184$  ( $df=7176$ ) at baseline and  $n=6,051$  ( $df=6043$ ) at follow-up.

## Supplemental Table 2

*t*-value for Each Standardized Beta Coefficient Reported in Table 3

|                         | Life Satisfaction |           |        | Loneliness |           |        |
|-------------------------|-------------------|-----------|--------|------------|-----------|--------|
|                         | Baseline          | Follow up | Change | Baseline   | Follow up | Change |
| Demographic covariates  |                   |           |        |            |           |        |
| Age                     | 10.06             | 4.94      | .19    | -7.66      | -3.15     | 1.04   |
| Age squared             | -4.60             | -4.39     | -3.60  | 5.88       | 7.68      | 6.02   |
| Sex                     | -.92              | .92       | 1.54   | 3.57       | 4.27      | 3.17   |
| Ethnicity (Black)       | -7.36             | -6.82     | -3.71  | 3.98       | 3.68      | 1.83   |
| Ethnicity (Other)       | -.41              | -.17      | 1.59   | .45        | .47       | -.97   |
| Education               | 8.50              | 8.75      | 5.62   | -9.16      | -6.69     | -2.80  |
| Discrimination based on |                   |           |        |            |           |        |
| Race                    | -2.74             | -1.91     | -.10   | 5.16       | 2.38      | -.86   |
| Ancestry                | -2.26             | -1.36     | -.74   | 6.99       | 2.71      | -.36   |
| Sex                     | -.84              | .09       | .21    | 3.58       | 3.72      | 2.27   |
| Age                     | -9.39             | -7.39     | -4.09  | 15.68      | 11.26     | 4.61   |
| Weight                  | -9.59             | -8.54     | -4.91  | 12.05      | 9.46      | 3.42   |
| Physical disability     | -14.20            | -10.47    | -6.37  | 15.38      | 11.35     | 4.99   |
| Appearance              | -8.06             | -7.02     | -3.71  | 11.68      | 7.66      | 2.75   |
| Sexual orientation      | -.93              | -1.12     | -.85   | 3.34       | 1.77      | .07    |

*Note.* *t*-statistic for each standardized beta coefficient in Table 3. For life satisfaction,  $n=7,554$  ( $df=7546$ ) at baseline and  $n=5,507$  ( $df=5499$ ) at follow-up. For loneliness,  $n=7,547$  ( $df=7539$ ) at baseline and  $n=5,512$  ( $df=5509$ ) at follow-up.

## Supplemental Table 3

*t*-value for Each Standardized Beta Coefficient Reported in Table 4

|                         | Memory   |           |        | Mental Status |           |        |
|-------------------------|----------|-----------|--------|---------------|-----------|--------|
|                         | Baseline | Follow up | Change | Baseline      | Follow up | Change |
| Demographic covariates  |          |           |        |               |           |        |
| Age                     | -32.02   | -31.11    | -21.32 | -1.89         | -5.28     | -3.76  |
| Age squared             | -9.26    | -9.27     | -7.46  | -3.97         | -4.11     | -1.66  |
| Sex                     | 13.93    | 14.76     | 9.60   | -4.14         | 5.35      | -2.26  |
| Ethnicity (Black)       | -12.25   | -9.53     | -4.44  | -15.28        | -16.19    | -6.77  |
| Ethnicity (Other)       | -5.81    | -3.60     | -.81   | -3.50         | -2.10     | -.02   |
| Education               | 28.86    | 27.83     | 16.48  | 29.00         | 26.68     | 11.02  |
| Discrimination based on |          |           |        |               |           |        |
| Race                    | -3.19    | -.37      | .98    | .42           | -1.06     | -.98   |
| Ancestry                | -2.04    | .12       | 1.23   | 1.11          | .27       | -.01   |
| Sex                     | 2.96     | 1.27      | .02    | 4.24          | 2.73      | -.20   |
| Age                     | -.12     | 1.44      | 1.85   | 2.88          | .70       | -.31   |
| Weight                  | -1.69    | .32       | .94    | -1.49         | -1.78     | -1.04  |
| Physical disability     | -8.19    | -6.56     | -3.79  | -4.81         | -3.74     | -1.52  |
| Appearance              | -1.06    | -1.16     | -.99   | 1.18          | .98       | 2.34   |
| Sexual orientation      | -1.76    | -2.84     | -2.29  | -.04          | -.22      | -.13   |

*Note.* *t*-statistic for each standardized beta coefficient in Table 4. For memory,  $n=7,507$  ( $df=7499$ ) at baseline and  $n=6,091$  ( $df=6083$ ) at follow-up. For mental status,  $n=4,593$  ( $df=4585$ ) at baseline and  $n=4,234$  ( $df=4226$ ) at follow-up.

Supplemental Table 4

*Regression Analysis Predicting Self-rated Health and Disease Burden from Covariates and Discrimination Accounting for Strata and Primary Sampling Units, as well as the Sampling Weights for the Leave-Behind Questionnaire*

| Discrimination<br>based on: | Self-rated Health (poor) |            |            | Disease Burden |            |            |
|-----------------------------|--------------------------|------------|------------|----------------|------------|------------|
|                             | Baseline                 | Follow up  | Change     | Baseline       | Follow up  | Change     |
| Race                        | .02 (.03)                | .02 (.02)  | .00 (.01)  | .03 (.02)      | .04 (.02)  | .02 (.01)  |
| Ancestry                    | .02 (.02)                | .03 (.02)  | .02 (.01)  | .00 (.02)      | .02 (.02)  | .02 (.01)  |
| Sex                         | -.03 (.01)*              | -.01 (.01) | .00 (.01)  | -.01 (.01)     | -.03 (.02) | -.01 (.01) |
| Age                         | .05 (.01)*               | .09 (.01)* | .05 (.01)* | .07 (.01)*     | .12 (.02)* | .05 (.01)* |
| Weight                      | .15 (.01)*               | .15 (.01)* | .06 (.01)* | .18 (.02)*     | .20 (.02)* | .04 (.01)* |
| Physical disability         | .25 (.01)*               | .22 (.02)* | .06 (.01)* | .20 (.02)*     | .23 (.03)* | .04 (.01)* |
| Appearance                  | .05 (.01)*               | .04 (.01)* | .01 (.01)  | .05 (.02)*     | .05 (.02)* | .00 (.01)  |
| Sexual orientation          | .01 (.01)                | .01 (.02)  | .00 (.01)  | .01 (.02)      | .00 (.02)  | -.02 (.01) |
| Strata                      | 56                       | 56         | 56         | 56             | 56         | 56         |
| PSUs                        | 112                      | 112        | 112        | 112            | 112        | 112        |
| Design df                   | 56                       | 56         | 56         | 56             | 56         | 56         |

*Note.* Unstandardized beta coefficients (standard errors) from linear regression analyses controlling for age, age squared, sex, ethnicity, and education; to facilitate interpretation and comparison, all dependent variables were standardized before analysis so that the unstandardized beta coefficients would approximate standardized beta coefficients. For self-rated health,  $n=7,614$  at baseline and  $n=6,445$  at follow-up. For disease burden,  $n=7,184$  at baseline and  $n=6,051$  at follow-up.

\*  $p < .01$ .

Supplemental Table 5

*Regression Analysis Predicting Life Satisfaction and Loneliness from Covariates and Discrimination Accounting for Strata and Primary Sampling Units, as well as Sampling Weights*

| Discrimination based on: | Life Satisfaction |             |             | Loneliness |            |            |
|--------------------------|-------------------|-------------|-------------|------------|------------|------------|
|                          | Baseline          | Follow up   | Change      | Baseline   | Follow up  | Change     |
| Race                     | -.04 (.02)*       | -.03 (.02)  | .00 (.02)   | .08 (.02)* | .04 (.02)  | -.01 (.02) |
| Ancestry                 | -.03 (.02)        | -.02 (.02)  | -.01 (.01)  | .09 (.01)* | .04 (.02)  | .00 (.02)  |
| Sex                      | -.01 (.01)        | .00 (.02)   | .00 (.01)   | .04 (.01)* | .05 (.01)* | .02 (.01)  |
| Age                      | -.11 (.02)*       | -.10 (.01)* | -.05 (.01)* | .19 (.01)* | .16 (.02)* | .05 (.01)* |
| Weight                   | -.11 (.01)*       | -.11 (.02)* | -.06 (.02)* | .14 (.02)* | .13 (.02)* | .04 (.01)* |
| Physical disability      | -.17 (.01)*       | -.16 (.02)* | -.08 (.02)* | .18 (.01)* | .17 (.02)* | .06 (.02)* |
| Appearance               | -.09 (.02)*       | -.09 (.02)* | -.04 (.01)* | .13 (.02)* | .10 (.02)* | .03 (.02)  |
| Sexual orientation       | -.01 (.01)        | -.02 (.02)  | -.01 (.01)  | .04 (.01)* | .02 (.02)  | .00 (.01)  |
| Strata                   | 56                | 56          | 56          | 56         | 56         | 56         |
| PSU                      | 112               | 112         | 112         | 112        | 112        | 112        |
| Design df                | 56                | 56          | 56          | 56         | 56         | 56         |

*Note.* Unstandardized beta coefficients (standard errors) from linear regression analyses controlling for age, age squared, sex, ethnicity, and education; to facilitate interpretation and comparison, all dependent variables were standardized before analysis so that the unstandardized beta coefficients would approximate standardized beta coefficients. For life satisfaction,  $n=7,554$  at baseline and  $n=5,507$  at follow-up. For loneliness,  $n=7,547$  at baseline and  $n=5,512$  at follow-up.

\*  $p < .01$ .

Supplemental Table 6

*Regression Analysis Predicting Memory and Mental Status from Covariates and Discrimination Accounting for Strata and Primary Sampling Units, as well as Sampling Weights*

| Discrimination based on: | Memory      |             |             | Mental Status |             |            |
|--------------------------|-------------|-------------|-------------|---------------|-------------|------------|
|                          | Baseline    | Follow up   | Change      | Baseline      | Follow up   | Change     |
| Race                     | -.13 (.04)* | -.01 (.05)  | .04 (.04)   | .01 (.03)     | -.05 (.04)  | -.04 (.04) |
| Ancestry                 | -.07 (.05)  | .00 (.06)   | .04 (.04)   | .04 (.03)     | .01 (.04)   | .00 (.03)  |
| Sex                      | .10 (.04)*  | .05 (.05)   | .00 (.04)   | .16 (.03)*    | .10 (.04)*  | -.01 (.05) |
| Age                      | .00 (.04)   | .05 (.04)   | .06 (.04)   | .09 (.03)*    | .02 (.04)   | -.01 (.04) |
| Weight                   | -.05 (.04)  | .01 (.04)   | .03 (.03)   | -.06 (.04)    | .06 (.04)   | -.04 (.05) |
| Physical disability      | -.27 (.04)* | -.26 (.05)* | -.13 (.05)* | -.15 (.04)*   | -.15 (.05)* | -.06 (.05) |
| Appearance               | -.03 (.05)  | -.04 (.04)  | -.03 (.04)  | .04 (.03)     | .04 (.03)   | .08 (.03)  |
| Sexual orientation       | -.06 (.04)  | -.11 (.05)* | -.07 (.04)  | .00 (.03)     | .00 (.04)   | .00 (.04)  |
| Strata                   | 56          | 56          | 56          | 52            | 52          | 52         |
| PSU                      | 112         | 112         | 112         | 104           | 104         | 104        |
| Design df                | 56          | 56          | 56          | 52            | 52          | 52         |

*Note.* Unstandardized beta coefficients (standard errors) from linear regression analyses controlling for age, age squared, sex, ethnicity, and education; to facilitate interpretation and comparison, all dependent variables were standardized before analysis so that the unstandardized beta coefficients would approximate standardized beta coefficients. For memory,  $n=7,507$  at baseline and  $n=6,091$  at follow-up. For mental status,  $n=4,593$  at baseline and  $n=4,234$  at follow-up.

\*  $p < .01$ .
